# Supplementary material for: Hybrid Seed Set in Relation with Male Floral Traits, Estimation of Heterosis and Combining Abilities for Yield and Its Components in Wheat (Triticum aestivum L.)
Source: MDPI journal article supplement (doi:10.3390/plants11040508), 2022-02-14
Supplement: s1 [file s1]

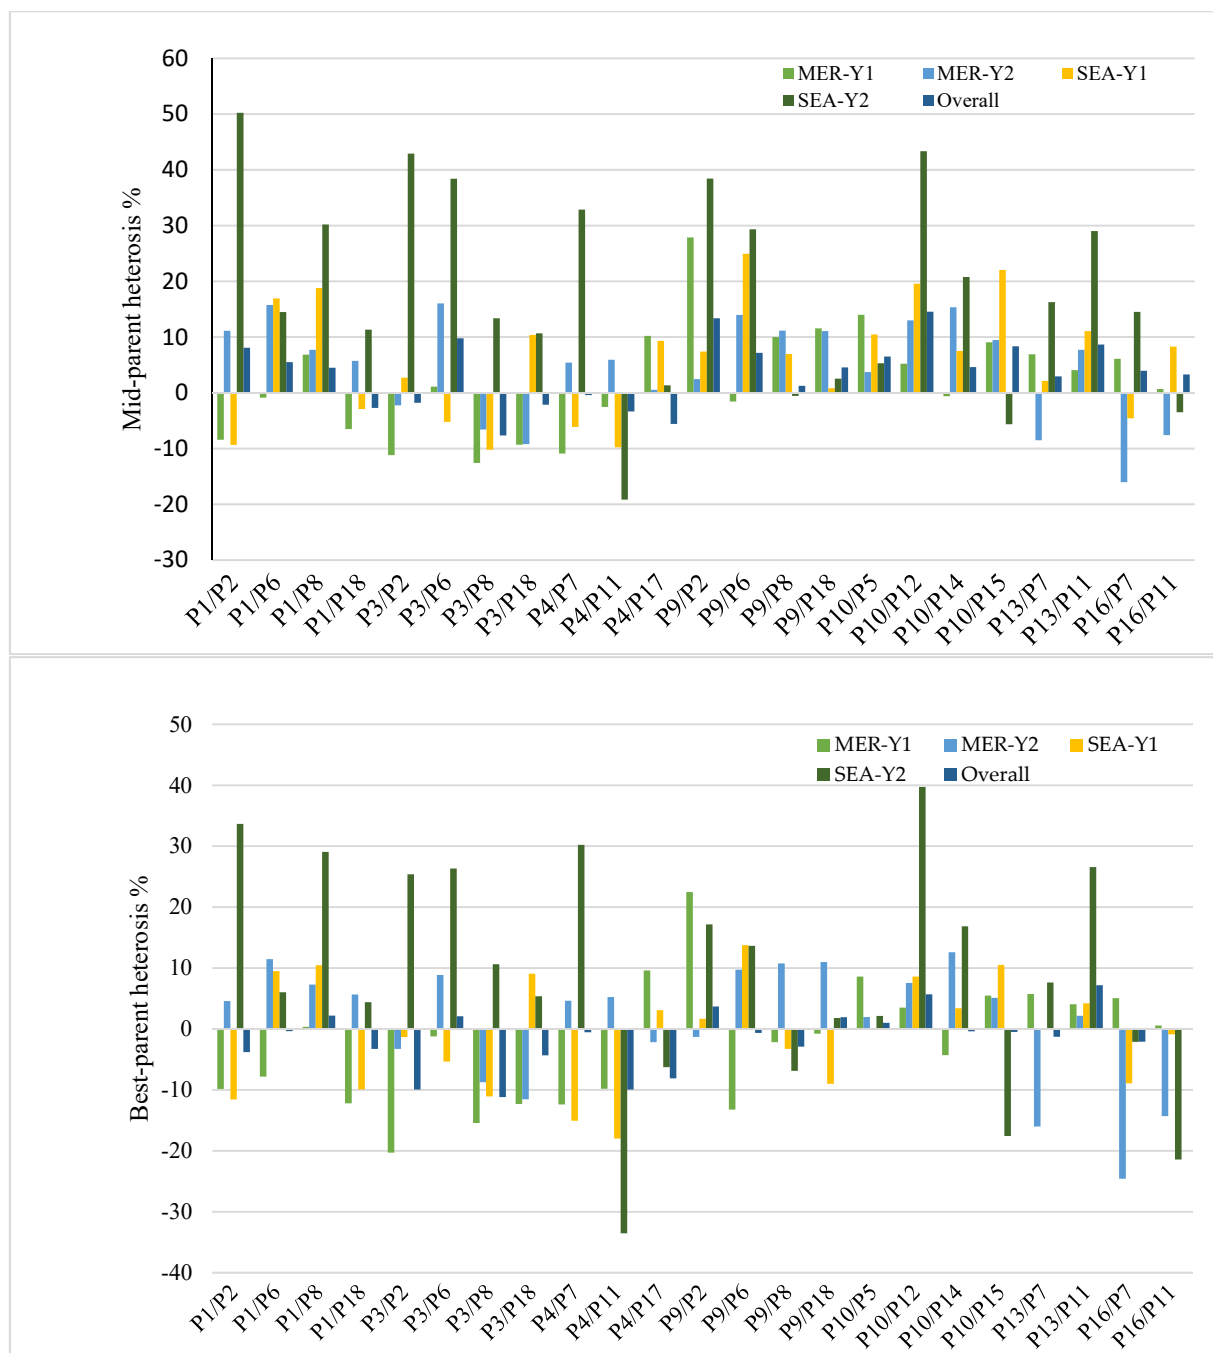

**Figure S1.** Mid- and best-parent heterosis for biomass in Merchouch and Sidi El Aydi during 2019 and 2020 seasons

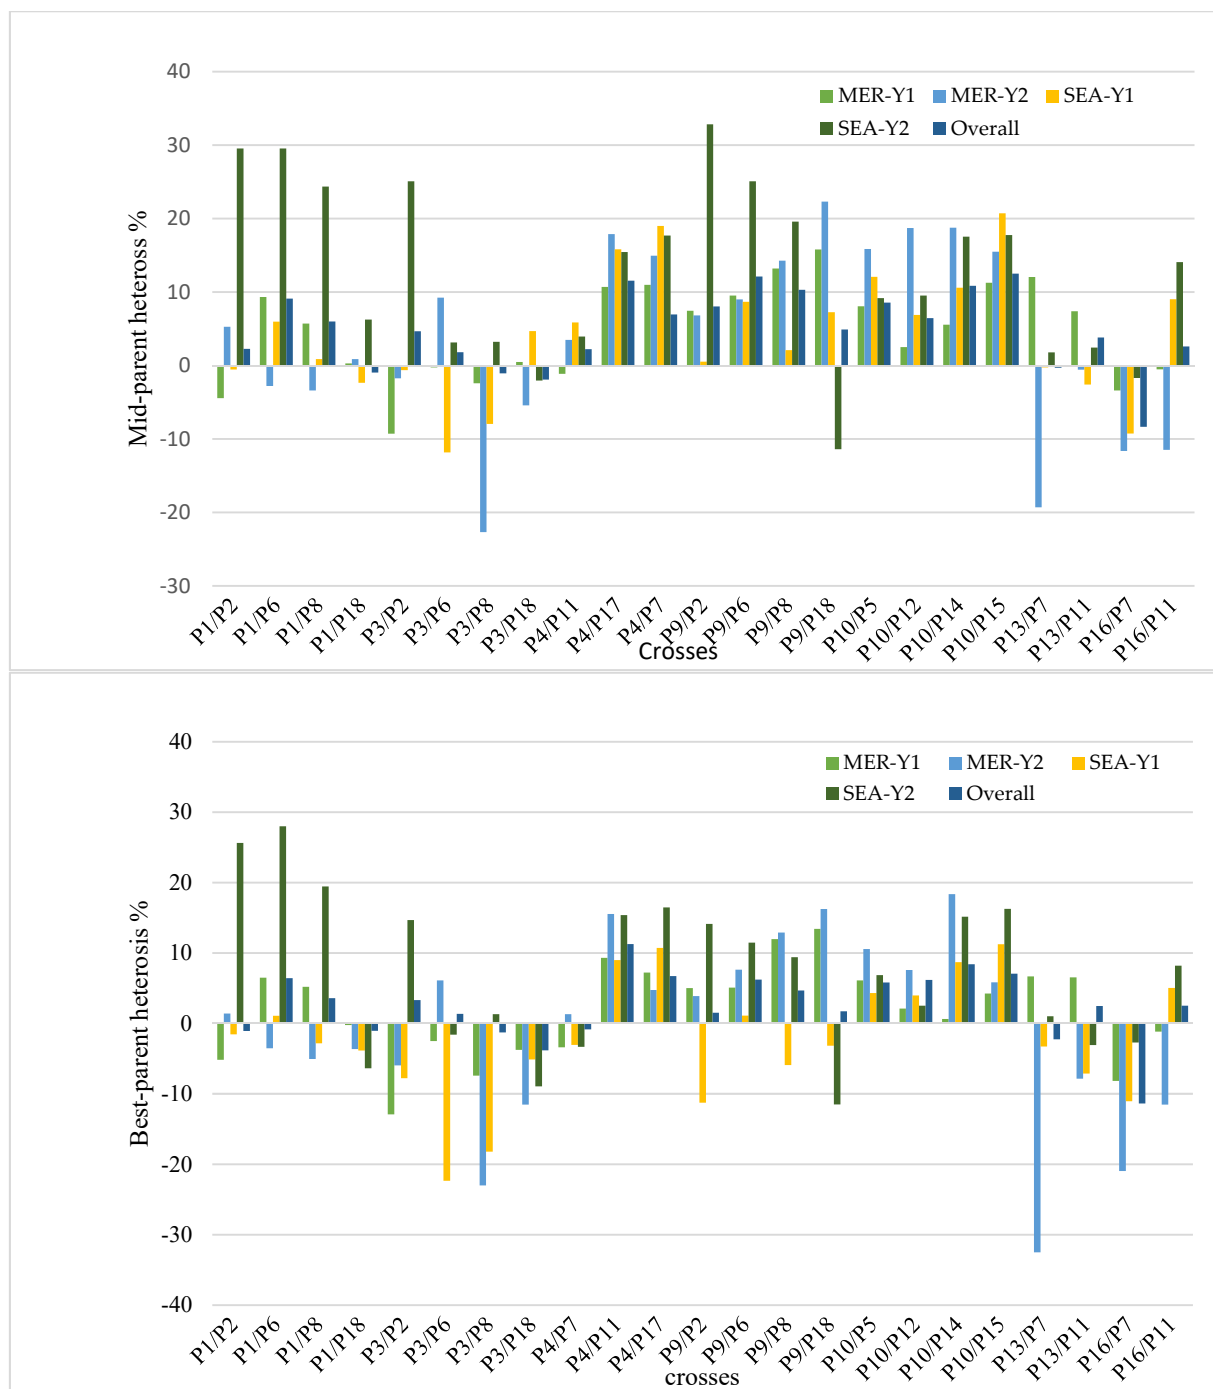

**Figure S2.** Mid- and best-parent heterosis for thousand kernel weight in Merchouch and Sidi El Aydi during 2019 and 2020 seasons

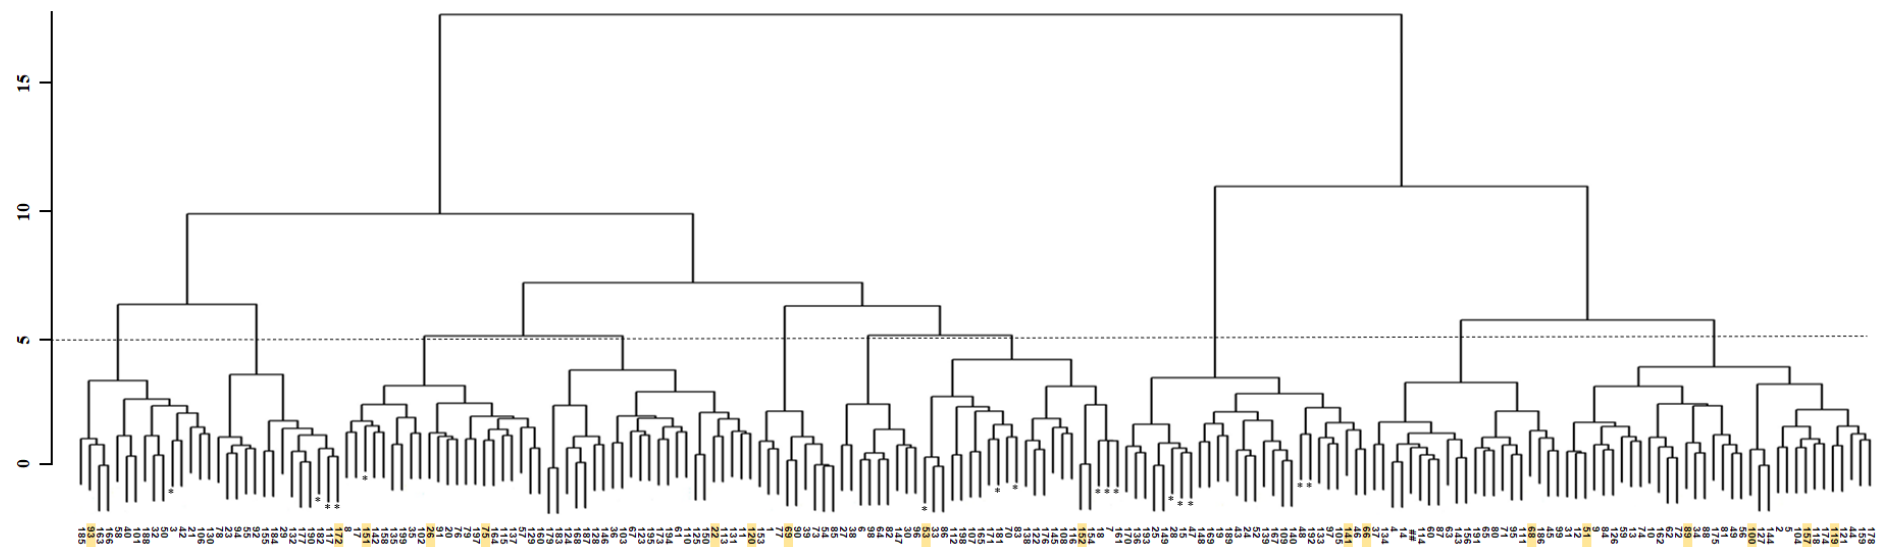

**Figure S3.** Cluster analysis of genetic relationships among 196 genotypes used initially to select the most promising lines for hybrid wheat production. The yellow marked lines were those used in this study. \*, Genotypes with superior floral trait combinations.
