# Supplementary material for: Hybrid Seed Set in Relation with Male Floral Traits, Estimation of Heterosis and Combining Abilities for Yield and Its Components in Wheat (Triticum aestivum L.)
Source: Plants (Basel). 2022 Feb 14;11(4):508. doi: 10.3390/plants11040508 (PMC8880032; doi:10.3390/plants11040508)
Supplement: Supplementary file 1 [file plants-11-00508-s001.zip › Supporting tables. Sel-Hanafi.xlsx]

## Sheet: Table S1
Table S1. Hybrid seed set using CHA at 13.5 l/ha.
Parental combination	cross code	DH	PLH	SPKLSP	G.SPK	PSH	VAEX	PM	AL	SEEDSET
P1/P18	151/89	100.5	100	21.35	2.2075	9	9	39.58	3.7	47.05
P10/P5	53/120	109	99	20.75	1.873	8.25	8.25	35.7812	4	38.75
P1/P6	151/157	99	99.5	20.4	2.208	8.375	8.625	39.0187	3.85	45.1
P10/P15	53/93	108	98	20.4	1.944	8.625	8.75	38.1688	3.85	39.6
P10/P12	53/69	109	98	20.2	1.924	8.5	8.5	36.8275	3.95	38.6
P1/P2	151/152	100.5	99	20.1	2.177	8.625	9	38.8738	3.9	43.65
P9/P6	51/157	105	99.5	20	1.584	7.625	7.375	32.3875	3.9	31.6
P16/P7	22/119	109	97.5	19.8	1.898	8.125	8.625	35.5838	3.85	37.85
P10/P14	53/68	107.5	97	19.7	1.9105	7.875	7.875	34.41	3.95	37.45
P16/P11	22/66	107	97.5	19.6	1.9455	8.125	7.875	35.3075	3.9	38.1
P3/P18	172/89	104.5	98	19.6	1.782	7.75	7.875	33.0112	4.05	35.05
P3/P2	172/152	104	98.5	19.55	1.754	7.125	7.25	30.6737	3.6	33.9
P3/P8	172/100	100.5	98.5	19.45	1.618	6.875	7.125	29.9413	3.65	31.35
P3/P6	172/157	102	98.5	19.35	1.6755	7	7.25	31.0188	3.6	32.45
P4/P17	141/75	109	97	19.15	1.8705	7.75	8	33.5375	4	35.7
P4/P11	141/66	107.5	97	19.1	1.857	7.375	7.375	32.7775	3.85	35.4
P1/P8	P1/P8	106.5	98.5	19.05	1.956	7.25	7.625	33.215	3.9	37.15
P4/P7	141/119	107	97	18.95	1.8945	7.625	7.25	34.9038	3.95	35.8
P9/P8	51/100	102.5	99	18.95	1.372	6.875	6.25	26.8	3.75	25.95
P13/P11	26/66	105	97	18.85	1.832	7.375	7.75	32.0175	3.9	34.65
P13/P7	26/119	104.5	96.5	18.75	1.7875	7.125	7.125	31.425	3.7	33.35
P9/P18	51/89	99.5	98	18.55	1.4935	6.375	6.25	27.7425	3.5	27.5
P9/P2	51/152	99.5	97.5	18.3	1.336	6	6	26.545	3.6	24.5

## Sheet: Table S2
Table S2. Performance of the parents and the hybrids and the statistics summary for the traits evaluated across years and environments.
	DH (Days)					PLH (cm)					SPL (cm)					SLP					TLP
Parents/F1 hybrids	E1Y1	E1Y2	E2Y1	E2Y2	Overall	E1Y1	E1Y2	E2Y1	E2Y2	Overall	E1Y1	E1Y2	E2Y1	E2Y2	Overall	E1Y1	E1Y2	E2Y1	E2Y2	Overall	E1Y1	E1Y2	E2Y1	E2Y2	Overall
P1	94.3258	97.3204	79.79	88.21	90.07	101.68	99.18	77.59	78	89.21	12.34	13.75	12.59	12.49	12.83	21.81	22.99	21.69	23.96	22.54	4.366	5.168	4.217	5.159	4.737
P2	91.3392	99.64	84.81	91.35	91.8	84.63	80.81	63.18	78.46	76.81	12.14	13.83	12.75	12.97	12.96	21.31	23.07	23.26	23.49	22.69	4.675	4.849	4.111	3.63	4.331
P3	92.5477	102.586	79.68	90.69	91.53	87.39	97.7	84.55	77.16	86.84	11.32	11.42	10.94	12.35	11.57	22.58	23.19	20.93	24.35	22.81	5.346	5.558	3.632	5.055	4.943
P4	92.3484	107.161	86.47	88.13	93.66	88.98	99.46	73.44	82.31	86	11.33	13.37	10.19	13.15	11.96	20.01	22.49	21.09	22.34	21.46	3.985	5.777	4.045	4.408	4.527
P5	98.3339	107.797	86.87	90.98	95.96	79.23	89.96	70.09	70.93	77.69	11.09	11.51	12.39	11.68	11.67	22.04	22.29	22.5	23.05	22.47	5.029	5.079	4.775	3.662	4.711
P6	94.3258	99.8204	74.79	89.21	89.69	85.18	84.18	69.09	81	79.96	11.37	12.48	11.09	11.82	11.73	20.91	22.66	20.89	24.06	22.06	4.316	5.338	4.067	3.409	4.292
P7	97.2528	107.614	91.74	88.01	93.41	79.31	99.93	74.77	80.76	83.55	10.29	12.29	11.74	13.19	11.89	20.38	21.71	21.92	23.95	22.02	3.488	4.263	4.018	4.375	4.104
P8	94.0934	102.998	87.12	91.73	93.92	93	95.06	77.78	79.96	86.42	11.45	10.99	11.25	10	10.91	16.66	22.72	22.04	25.28	21.66	4.851	4.857	4.246	3.811	4.457
P9	97.0756	99.7694	74.3	95.97	91.96	98.59	95.84	81.99	83	89.74	11.44	12.97	12.4	11.13	11.99	19.79	24.31	21.97	22.57	22.15	4.961	6.262	4.145	5.122	5.071
P10	103.781	107.797	78.36	87.29	94.34	90.52	96.07	65.71	85.09	83.96	12.38	13.59	11.69	12.98	12.62	21.59	23.32	21.82	25.57	23.05	5.103	4.802	4.031	4.442	4.567
P11	99.3627	106.152	73.95	99.36	93.36	84.76	94.21	83.03	67.83	82.5	11.32	12.34	12.38	11.59	11.89	20.16	21.99	21.42	22.24	21.42	4.618	5.337	4.035	3.685	4.373
P12	99.0828	107.454	83.86	92.63	95.71	87.18	94.3	66.92	88.73	84.33	12.01	12.4	12.11	13.97	12.61	21.06	22.07	20.8	20.97	21.17	5.193	4.157	4.539	4.44	4.6
P13	97.3195	102.671	72.49	88.67	90.16	88.96	90.7	68.03	81.4	82.23	11.05	13.43	12.78	12.33	12.32	21.06	24.2	22.74	22.02	22.52	5.116	6.302	4.106	4.177	4.867
P14	98.85	101.173	80.71	90.78	92.77	86.28	94.98	74.41	83.15	84.88	11.64	13.02	12.63	11.79	12.31	20.19	22.18	22.93	24.62	22.58	4.376	4.815	4.328	3.916	4.356
P15	101.227	110.027	84.56	89.62	96.32	84.11	92.5	68.29	96.51	85.21	12.48	11.64	12.74	11.85	12.17	20.02	22.57	21.39	21.85	21.53	3.943	5.65	4.468	4.708	4.648
P16	98.7033	106.047	85	92.55	95.71	92.11	94.19	72.86	71.93	82.66	11.05	12.52	11.61	12.26	11.86	20.62	22.42	23.17	21.82	21.95	5.275	5.68	4.303	4.359	4.887
P17	92.0477	110.586	81.68	93.69	94.65	81.39	94.2	71.05	69.66	79.21	10.55	12.26	11.69	12.19	11.73	20.68	22.69	22.07	23.65	22.32	4.846	5.058	3.832	4.22	4.534
P18	94.3205	100.478	77.85	99.84	93.23	79.78	84.33	82	73.97	80.22	11.16	12.57	11.73	13.54	12.25	21.8	23.37	20.09	23.06	22.11	5.17	5.398	4.032	4.592	4.867
Crosses
P1/P2	98.1867	98.6937	87.28	93.52	94.36	99.78	83.42	78.31	71.49	83.74	11.79	12.71	12.3	13.88	12.6	20.79	21.59	20.98	22.33	21.39	5.176	4.649	3.889	4.97	4.532
P1/P6	96.3195	100.671	86.99	92.67	94.03	100.46	88.2	68.53	72.9	82.48	11.16	12.13	11.68	12.19	11.72	22.16	23.19	21.14	23.82	22.59	5.616	5.472	3.956	4.677	4.872
P1/P8	98.8484	97.6612	84.47	92.13	93.41	98.98	89.46	80.44	88.81	89.37	12.37	13.2	13.39	12.82	12.9	20.61	24.49	22.39	21.94	22.33	3.985	5.107	3.745	4.908	4.41
P1/P18	98.9175	96.259	87.57	93.91	94.79	98.14	89.15	74.69	75.66	84.46	12.37	13.39	11.75	14.99	13.13	20.63	24.08	22.85	23.93	22.89	4.108	4.789	4.281	4.693	4.397
P3/P2	95.2149	99.4753	84.71	90.18	92.42	88.92	86.77	61.36	70.86	76.65	12.12	13.1	11.75	11.25	12.04	21.42	23.53	22.24	23.02	22.53	4.482	5.839	3.824	5.514	4.91
P3/P6	97.8384	107.621	89.36	90.85	96.37	92.08	93.26	80.48	75.5	85.32	11.5	12.1	11.74	12.31	11.94	21.52	24.08	22.29	23.03	22.73	4.564	5.164	3.685	5.307	4.718
P3/P8	89.8384	103.121	78.86	92.85	89.99	92.58	94.76	67.98	73.5	82.2	11.23	13.77	11.74	11.64	12.13	20.82	21.74	22.09	22.03	21.67	4.214	3.999	4.235	4.807	4.352
P3/P18	93.9175	107.259	85.57	93.91	94.67	94.14	87.65	66.69	81.16	82.46	11.77	13.14	11.75	14.99	12.92	21.13	22.58	21.75	24.43	22.49	4.658	4.624	4.431	4.443	4.469
P4/P7	100.053	104.429	73.61	92.56	92.86	94.29	100.55	80.64	80.19	88.96	11.87	13.08	11.55	11.73	12.15	21.09	22.47	21.66	24.48	22.38	4.492	3.993	3.867	4.623	3.979
P4/P11	97.973	100.905	80.98	91.82	92.67	88.57	99.17	78.84	74.76	85.47	11.83	12.82	12.45	11.85	12.22	19.97	23.36	22.88	20.1	21.56	3.919	4.83	4.332	3.728	4.252
P4/P17	98.0153	100.868	84.49	94.51	94.19	92.82	97.63	73.14	77.72	85.5	11.03	13.1	10.99	10.66	11.47	21.32	24.67	21.39	21.59	22.27	5.76	5.349	4.536	4.498	4.872
P9/P2	99.8919	100.722	80.34	91.84	92.99	100.15	84.15	70.03	73.09	81.7	12.16	12.56	12.75	12.12	12.38	21.15	23.55	20.54	23.23	22.12	4.528	5.349	3.925	5.54	4.879
P9/P6	96.6358	96.9611	85.14	85.42	90.94	96.24	88.52	89.58	72.92	86.83	11.97	12.97	11.89	12.99	12.49	21.78	24.69	21.12	22.21	22.48	4.192	5.701	4.7	4.582	4.845
P9/P8	98.8852	99.9931	88.13	93.28	94.21	97.56	96.5	78.38	87.63	89.91	11.96	14.48	12.47	12.34	12.71	20.8	22.83	23.03	23.23	22.48	4.937	6.275	3.863	4.269	4.755
P9/P18	100.576	101.269	81.3	95.97	94.96	99.59	92.84	72.99	72.5	84.37	12.99	13.63	15	12.47	13.53	21.19	24.31	21.97	23.47	22.73	5.111	4.602	3.995	4.372	4.469
P10/P5	97.4596	104.085	76.46	93.67	92.82	92.61	95.04	87.76	69.8	86.5	11.86	12.67	12.24	12.87	12.38	21.66	24.61	22.31	21.5	22.53	5.26	6.154	4.239	4.257	5.023
P10/P12	100.203	109.047	89	93.55	98.08	96.11	96.69	81.36	86.93	90.16	10.57	13.3	11.76	11.32	11.74	20.42	24.59	22.77	24.15	22.93	4.125	5.68	3.953	4.439	4.532
P10/P14	98.8076	103.71	90.19	88.09	95.12	91.53	99.02	87.61	75.19	88.47	12.24	12.26	11.64	12.34	12.11	21.14	24.38	23.73	24.96	23.6	4.635	5.796	4.024	5.145	4.862
P10/P15	95.7033	110.047	83	96.55	96.46	90.61	99.19	76.86	80.43	86.66	10.84	12.93	10.75	11.99	11.63	21.32	25.46	19.97	22.82	22.34	3.975	5.515	3.953	4.274	4.412
P13/P7	98.3339	102.797	82.37	95.98	94.84	89.73	98.96	79.09	68.93	84.32	11	13.16	11.34	12.43	11.99	21.1	23.46	21.26	22.85	22.17	4.529	4.414	4.625	5.062	4.732
P13/P11	100.319	101.671	86.99	95.17	95.91	91.96	93.7	76.53	67.4	82.35	11.55	14.71	11.78	12.66	12.6	21.56	24.36	19.44	24.17	22.39	5.116	5.972	3.656	4.177	4.672
P16/P7	96.2582	106.456	83.18	85.37	92.87	90.71	98.28	66.36	90.29	86.17	11.67	12.2	13.5	11.58	12.28	19.99	22.83	22.12	23.88	22.14	3.833	4.534	4.354	4.443	4.299
P16/P11	99.1169	104.011	84.76	94.74	95.48	95.12	94.47	69.14	75.82	83.61	11.01	14.41	10.73	14.64	12.62	20.91	23.15	22.01	22.84	22.27	4.594	4.845	3.971	4.952	4.546
Min	89.8384	96.259	72.49	85.37	89.69	79.23	80.81	61.36	67.4	76.65	10.29	10.99	10.19	10	10.91	16.66	21.59	19.44	20.1	21.17	3.488	3.993	3.632	3.409	3.979
Max	103.781	110.586	91.74	99.84	98.08	101.68	100.55	89.58	96.51	90.16	12.99	14.71	15	14.99	13.53	22.58	25.46	23.73	25.57	23.6	5.76	6.302	4.775	5.54	5.071
σ2g	3.58966	6.61419e-16	7.50756	2.77697	13.72	2.04586	13.3322	21.662	15.94*	27.61*	0.166833	0.0377056	0.251639	0.714453	4.28	0.11*	0.35*	0.338776	0.548804	9.08*	0.106969	0.06*	0.156413	0.0234708	2.73
σ2e	8.7199	33.1619	16.2751	13.9178	37.6734	24.6836	53.0306	11.1757	52.7593	25.79	0.459604	1.15561	0.834613	1.19745	0.896793	0.694588	1.00703	1.15369	0.779988	0.825374	0.694588	0.110161	0.620235	0.587173	4.66
σ2L	NA	NA	NA	NA	15.69*	NA	NA	NA	NA	49.73*	NA	NA	NA	NA	0.180295	NA	NA	NA	NA	12.64	NA	NA	NA	NA	15.88*
h2	0.251552	0.13	0.379867	0.285231	0.21	0.142196	0.334581	0.694941	0.376613	0.38	0.420622	0.0612592	0.376173	0.544065	0.52	0.235478	0.406075	0.369996	0.584581	0.41	0.235478	0.50086	0.335268	0.074027	0.29
σ2g genotypic variance, σ2e error variance, σ2L x E location x environment variance, h2 repeatability, DH: days to heading, PLH: plant height, SPL: spike length, SPS: spikelets per spike, TLP: tillers per spike
* Significantly different from zero at the 0.05 level of probability

## Sheet: Table S3
Table S3. List of the 18 elite spring bread wheat parental lines used in this study.
Parent	Parent code	GID	Panel	Name/Pedigree
P1	Elt-151	1401151	R-H&D	QAMAR-6
P2	Elt-152	1401152	R-H&D	KAUZ//ALTAR 84/AOS/3/TNMU/MILAN/4/MILAN//PSN/BOW
P3	Elt-172	1401172	R-H&D	QADANFER-11/REBWAH-11
P4	Elt-141	1401141	R-H&D	VEE7/KAUZ//PFAU/MILAN/3/MILAN/PASTOR
P5	Elt-120	1401120	R-H&D	KAUZ//ALTAR 84/AOS 3/KAUZ/3/SHUHA-4//NS732/HER/4/QAFZAH-33
P6	Elt-157	1401157	R-H&D	SERI.1B//KAUZ/HEVO/3/AMAD/4/ATTILA//PSN/BOW/3/ATTILA/5/KAUZ'S'/SHUHA-15
P7	Elt-119	1401119	R-H&D	P1.861/RDWG//PBW343/3/MUNIA/ALTAR 84//AMSEL
P8	Elt-100	1401100	R-H&D	KABOWSH-1
P9	Elt-051	1401051	R-H&D	ANGI-2/HUBARA-3
P10	Elt-053	1401053	R-H&D	SOMAMA-9/ICARDA-SRRL-2
P11	Elt-066	1401066	R-H&D	HUBARA-5/PASTOR-2
P12	Elt-069	1401069	R-H&D	ATTILA*2/PBW65//PFAU/MILAN
P13	Elt-026	1401026	R-H&D	HUBARA-13/4/TRAP#1/BOW//PFAU/3/MILAN
P14	Elt-068	1401068	R-H&D	QAFZAH-23/SOMAMA-3//GOUMRIA-3
P15	Elt-093	1401093	R-H&D	QAFZAH-33*2/SALSAL-2
P16	Elt-022	1401022	R-H&D	ATTILA//VEE#5/DOBUC'S'/3/QADANFER-9
P17	Elt-075	1401075	R-H&D	ATTILA-7
P18	Elt-089	1401089	R-H&D	VEE/PJN//2*KAUZ/3/SHUHA-4/FOW-2
